# Supplementary material for: Limited Supply of Protein and Lysine Is Prevalent among the Poorest Households in Malawi and Exacerbated by Low Protein Quality
Source: MDPI journal article supplement (doi:10.3390/nu14122430), 2022-06-11
Supplement: s1 [file s1]

**Limited supply of protein and lysine is prevalent among the poorest households in Malawi and exacerbated by low protein quality**

Molly Muleya<sup>1</sup>, Kevin Tang<sup>2</sup>, Martin R. Broadley<sup>1,3</sup>, Andrew Salter<sup>1</sup>, Edward Joy<sup>2,3</sup>

<sup>1</sup>School of Biosciences, Future Food Beacon, University of Nottingham, Sutton Bonington Campus, Loughborough, Leicestershire LE12 5RD, UK

<sup>2</sup>Faculty of Epidemiology and Population Health, London School of Hygiene & Tropical Medicine, Keppel Street, London WC1E 7HT, UK

<sup>3</sup>Rothamsted Research, West Common, Harpenden, Hertfordshire, AL5 2JQ, UK

[\\*Email: Molly.Muleya@nottingham.ac.uk](mailto:Molly.Muleya@nottingham.ac.uk)

Tel: +44 (0) 115 95 16262

## Supplementary data

**Table S1: Estimated Average Requirements (EAR) of protein and indispensable amino acids for a 65 kg adult male**

| IAA     | EAR (g kg <sup>-1</sup> day <sup>-1</sup> ) | EAR (g day <sup>-1</sup> ) |
|---------|---------------------------------------------|----------------------------|
| Protein | 0.660                                       | 42.9                       |
| AAA     | 0.025                                       | 1.625                      |
| His     | 0.010                                       | 0.650                      |
| Ile     | 0.020                                       | 1.300                      |
| Leu     | 0.039                                       | 2.535                      |
| Lys     | 0.030                                       | 1.950                      |
| SAA     | 0.015                                       | 0.975                      |
| Thr     | 0.015                                       | 0.975                      |
| Try     | 0.004                                       | 0.260                      |
| Val     | 0.026                                       | 1.690                      |

AAA: Aromatic amino acids (phenylalanine + tyrosine), His – Histidine, Ile – isoleucine, Leu – Leucine, Lys – Lysine, SAA: Sulphur amino acids (methionine + cysteine), Thr – Threonine, Trp – Tryptophan. Estimates were derived from FAO (2011).

**Table S2: Proportion of total protein and indispensable amino acid dietary supplies by food group**

| Food group      | Protein | AAA   | His   | Ile   | Leu   | Lys   | SAA   | Thr   | Trp   | Val   |
|-----------------|---------|-------|-------|-------|-------|-------|-------|-------|-------|-------|
| Cereals         | 65.5%   | 67.9% | 68.8% | 61.8% | 75.9% | 44.3% | 71.0% | 63.8% | 54.6% | 66.9% |
| Legumes & nuts  | 14.9%   | 16.3% | 15.4% | 17.1% | 11.3% | 23.3% | 11.2% | 16.0% | 20.5% | 14.9% |
| Animal products | 11.2%   | 9.8%  | 10.5% | 14.2% | 8.7%  | 23.2% | 12.8% | 13.5% | 14.3% | 11.6% |
| Vegetables      | 3.6%    | 2.8%  | 2.1%  | 3.0%  | 1.7%  | 4.0%  | 1.8%  | 2.9%  | 4.6%  | 2.7%  |
| Roots & Tubers  | 1.9%    | 1.2%  | 1.2%  | 1.4%  | 0.8%  | 1.8%  | 1.5%  | 1.7%  | 3.1%  | 1.5%  |
| Dairy           | 0.7%    | 0.8%  | 0.7%  | 1.0%  | 0.6%  | 1.4%  | 0.6%  | 0.8%  | 1.1%  | 0.9%  |
| Fruits          | 0.4%    | 0.2%  | 0.4%  | 0.3%  | 0.2%  | 0.5%  | 0.2%  | 0.3%  | 0.5%  | 0.3%  |
| Others          | 1.6%    | 0.9%  | 0.9%  | 1.2%  | 0.8%  | 1.4%  | 1.0%  | 1.1%  | 1.4%  | 1.1%  |

AAA: Aromatic amino acids (phenylalanine + tyrosine), His – Histidine, Ile – isoleucine, Leu – Leucine, Lys – Lysine, SAA: Sulphur amino acids (methionine + cysteine), Thr – Threonine, Trp – Tryptophan. 'Others' include foods from other food groups with minor contributions (less than 1%) such as beverages, fats & oils, spices & condiments and foods purchased from vendors.

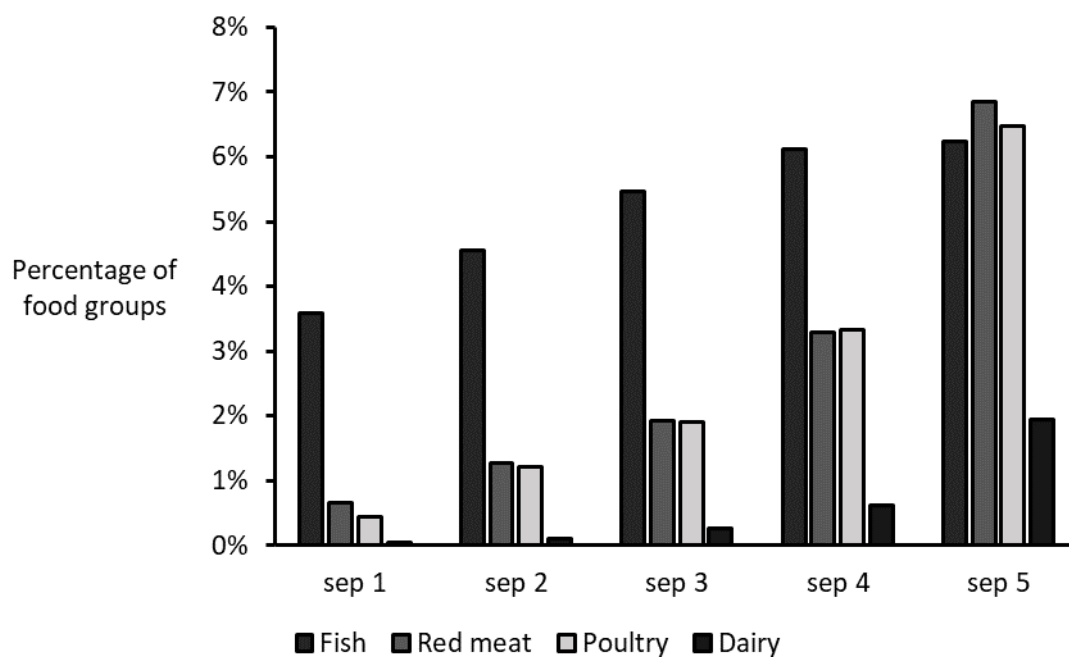

**Figure S1: Proportion of households reporting consumption of animal products in the past 7-days, by household socioeconomic position**

SEP: socioeconomic position (1 = poorest quintile, 5 = wealthiest quintile)

**Table S3: Summary statistics of total and available indispensable amino acid dietary supplies**

| Amino acid | Total supply (g AME <sup>-1</sup> day <sup>-1</sup> ) |        |      |      | Available supply (g AME <sup>-1</sup> day <sup>-1</sup> ) |        |      |      |
|------------|-------------------------------------------------------|--------|------|------|-----------------------------------------------------------|--------|------|------|
|            | Q1                                                    | Median | Q3   | Mean | Q1                                                        | Median | Q3   | Mean |
| AAA        | 4.9                                                   | 6.9    | 9.5  | 7.6  | 4.2                                                       | 5.9    | 8.1  | 6.5  |
| His        | 1.6                                                   | 2.3    | 3.2  | 2.5  | 1.3                                                       | 1.9    | 2.6  | 2.1  |
| Ile        | 2.1                                                   | 2.9    | 4.2  | 3.4  | 1.8                                                       | 2.5    | 3.6  | 2.9  |
| Leu        | 5.9                                                   | 8.4    | 11.5 | 9.2  | 5.4                                                       | 7.5    | 10.3 | 8.2  |
| Lys        | 2.1                                                   | 3.1    | 4.6  | 3.7  | 1.7                                                       | 2.6    | 3.8  | 3.1  |
| SAA        | 2.1                                                   | 2.9    | 3.9  | 3.2  | 1.8                                                       | 2.5    | 3.4  | 2.7  |
| Thr        | 2.1                                                   | 3.0    | 4.2  | 3.2  | 1.7                                                       | 2.4    | 3.4  | 2.9  |
| Try        | 0.5                                                   | 0.7    | 0.9  | 0.8  | 0.4                                                       | 0.6    | 0.8  | 0.6  |
| Val        | 2.8                                                   | 3.9    | 5.5  | 4.4  | 2.3                                                       | 3.3    | 4.6  | 3.7  |

AAA: Aromatic amino acids (phenylalanine + tyrosine), His – Histidine, Ile – isoleucine, Leu – Leucine, Lys – Lysine, SAA: Sulphur amino acids (methionine + cysteine), Thr – Threonine, Trp – Tryptophan.

**Table S4: Percentage of households at risk of indispensable amino acids deficiency due to inadequate dietary supply**

| IAA     | Total supply | Available supply |
|---------|--------------|------------------|
| Protein | 12           | 21               |
| AAA     | 2            | 3                |
| His     | 3            | 4                |
| Ile     | 7            | 11               |
| Leu     | 3            | 4                |
| Lys     | 21           | 33               |
| SAA     | 4            | 5                |
| Thr     | 3            | 6                |
| Try     | 4            | 9                |
| Val     | 7            | 11               |

AAA: Aromatic amino acids (phenylalanine + tyrosine), His – Histidine, Ile – isoleucine, Leu – Leucine, Lys – Lysine, SAA: Sulphur amino acids (methionine + cysteine), Thr – Threonine, Trp – Tryptophan.
